# Supplementary material for: Factors influencing the formation of polybromide monoanions in solutions of ionic liquid bromide salts
Source: Royal Society of Chemistry journal article supplement (doi:10.1039/c5cp06913k), 2016-01-01
Supplement: c5cp06913k1.pdf [file c5cp06913k1.pdf]

Supporting Information:

## Factors influencing the formation of polybromide monoanions in solutions of ionic liquid bromide salts

Max E. Easton, Antony J. Ward, Bun Chan, Leo Radom, Anthony F. Masters and Thomas Maschmeyer

### Additional DFT Data

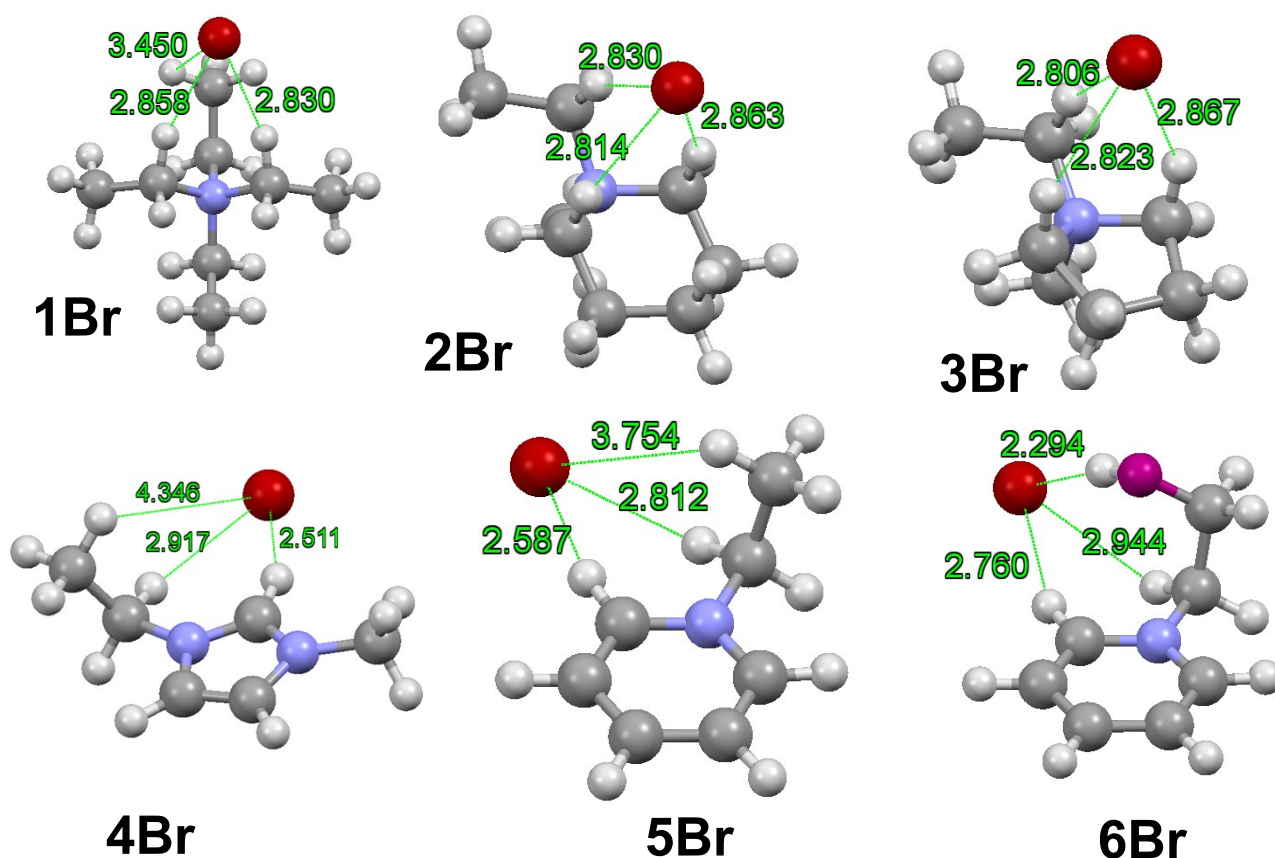

**Figure S1.** DFT energy-minimized structures for the bromide salts of the studied cations:  $[N_{2,2,2,2}]Br$ , **1Br**;  $[C_2MPip]Br$ , **2Br**;  $[C_2MPyrr]Br$ , **3Br**;  $[C_2Mim]Br$ , **4Br**;  $[C_2Py]Br$ , **5Br**;  $[C_2OHPy]Br$ , **6Br**.

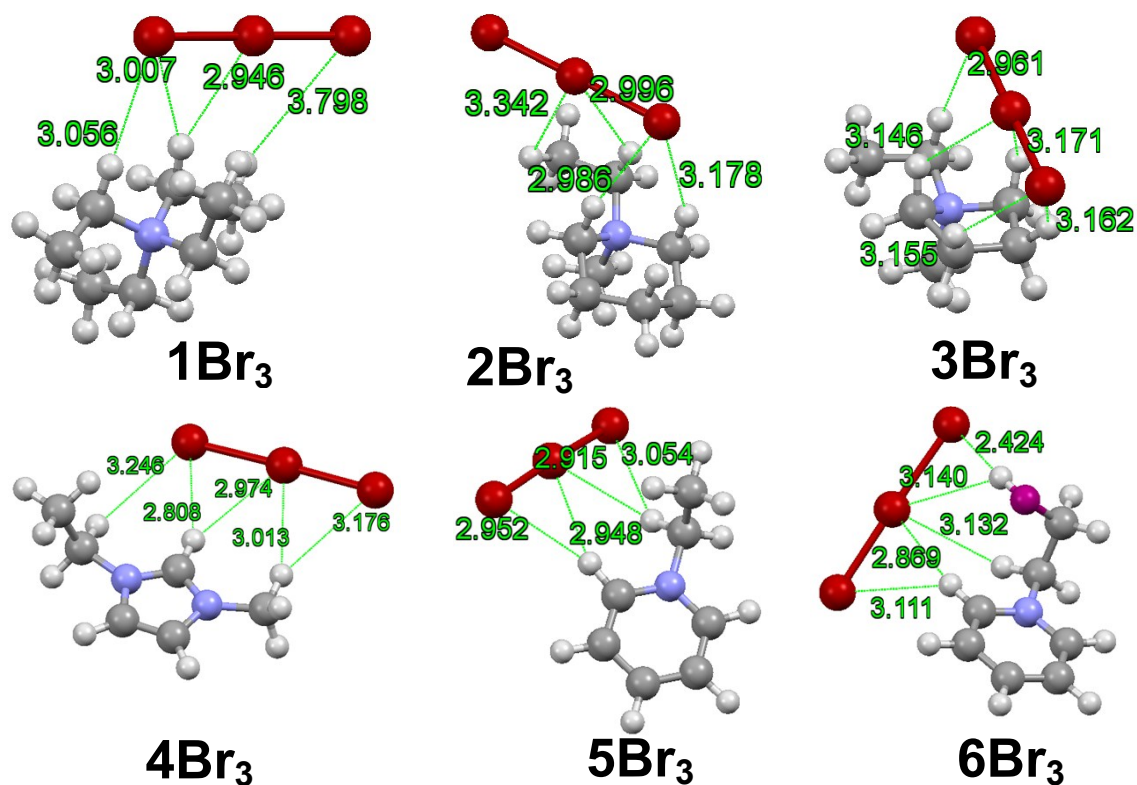

**Figure S2.** DFT energy-minimized structures for the tribromide salts of the studied cations:  $[\text{N}_{2,2,2,2}]\text{Br}_3$ , **1Br<sub>3</sub>**;  $[\text{C}_2\text{MPip}]\text{Br}_3$ , **2Br<sub>3</sub>**;  $[\text{C}_2\text{MPyrr}]\text{Br}_3$ , **3Br<sub>3</sub>**;  $[\text{C}_2\text{Mim}]\text{Br}_3$ , **4Br<sub>3</sub>**;  $[\text{C}_2\text{Py}]\text{Br}_3$ , **5Br<sub>3</sub>**;  $[\text{C}_2\text{OHPy}]\text{Br}_3$ , **6Br<sub>3</sub>**.

**Table S1.** Summary of data derived from modelling the ion-pairing step between an IL cation and a bromide anion (solvent-separated) by DFT methods

|                                     | shortest H...Br contact (H1, Å) | 2 <sup>nd</sup> shortest H...Br contact (H2, Å) | 3 <sup>rd</sup> shortest H...Br contact (H3, Å) |
|-------------------------------------|---------------------------------|-------------------------------------------------|-------------------------------------------------|
| <b>1</b> $[\text{N}_{2,2,2,2}]$     | 2.830                           | 2.858                                           | 3.450                                           |
| <b>2</b> $[\text{C}_2\text{MPip}]$  | 2.814                           | 2.830                                           | 2.863                                           |
| <b>3</b> $[\text{C}_2\text{MPyrr}]$ | 2.806                           | 2.823                                           | 2.867                                           |
| <b>4</b> $[\text{C}_2\text{MIm}]$   | 2.511                           | 2.917                                           | 4.345                                           |
| <b>5</b> $[\text{C}_2\text{Py}]$    | 2.587                           | 2.812                                           | 3.754                                           |
| <b>6</b> $[\text{C}_2\text{OHPy}]$  | 2.294                           | 2.760                                           | 2.944                                           |

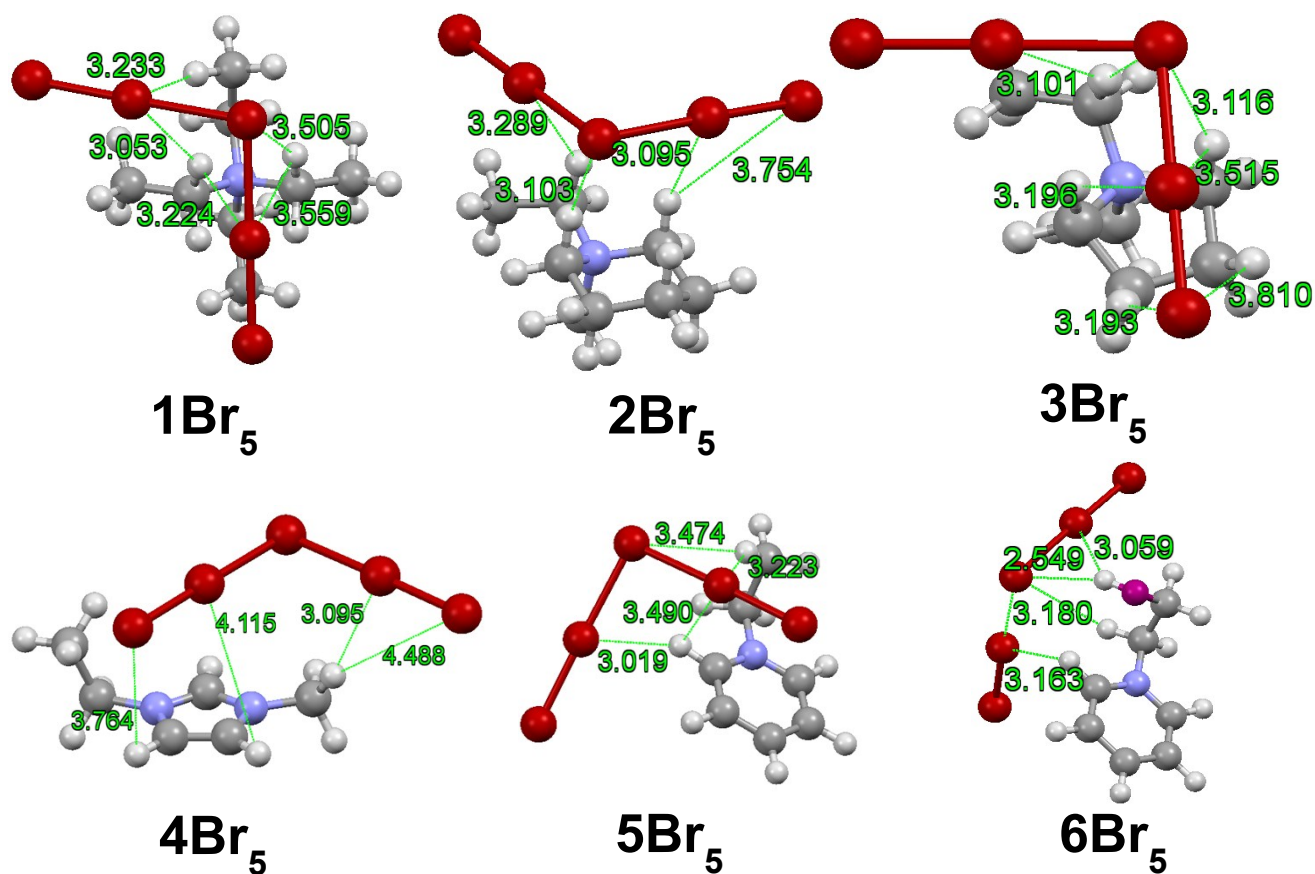

**Figure S3.** DFT energy-minimized structures for the pentabromide salts of the studied cations where: [N<sub>2,2,2,2</sub>]Br<sub>5</sub>, **1Br<sub>5</sub>**; [C<sub>2</sub>MPip]Br<sub>5</sub>, **2Br<sub>5</sub>**; [C<sub>2</sub>MPyrr]Br<sub>5</sub>, **3Br<sub>5</sub>**; [C<sub>2</sub>Mim]Br<sub>5</sub>, **4Br<sub>5</sub>**; [C<sub>2</sub>Py]Br<sub>5</sub>, **5Br<sub>5</sub>**; [C<sub>2</sub>OHPy]Br<sub>5</sub>, **6Br<sub>5</sub>**.

**Table S2.** Computed NBO charges on hydrogen atoms of IL cations [Q]<sup>+</sup>

|                                  | Charge on H1 | Charge on H2 | Charge on H3 |
|----------------------------------|--------------|--------------|--------------|
| <b>1</b> [N <sub>2,2,2,2</sub> ] | 0.278        | 0.278        | 0.256        |
| <b>2</b> [C <sub>2</sub> MPip]   | 0.275        | 0.274        | 0.276        |
| <b>3</b> [C <sub>2</sub> MPyrr]  | 0.276        | 0.276        | 0.275        |
| <b>4</b> [C <sub>2</sub> Mim]    | 0.299        | 0.277        | 0.253        |
| <b>5</b> [C <sub>2</sub> Py]     | 0.296        | 0.281        | 0.255        |
| <b>6</b> [C <sub>2</sub> OHPy]   | 0.505        | 0.294        | 0.282        |

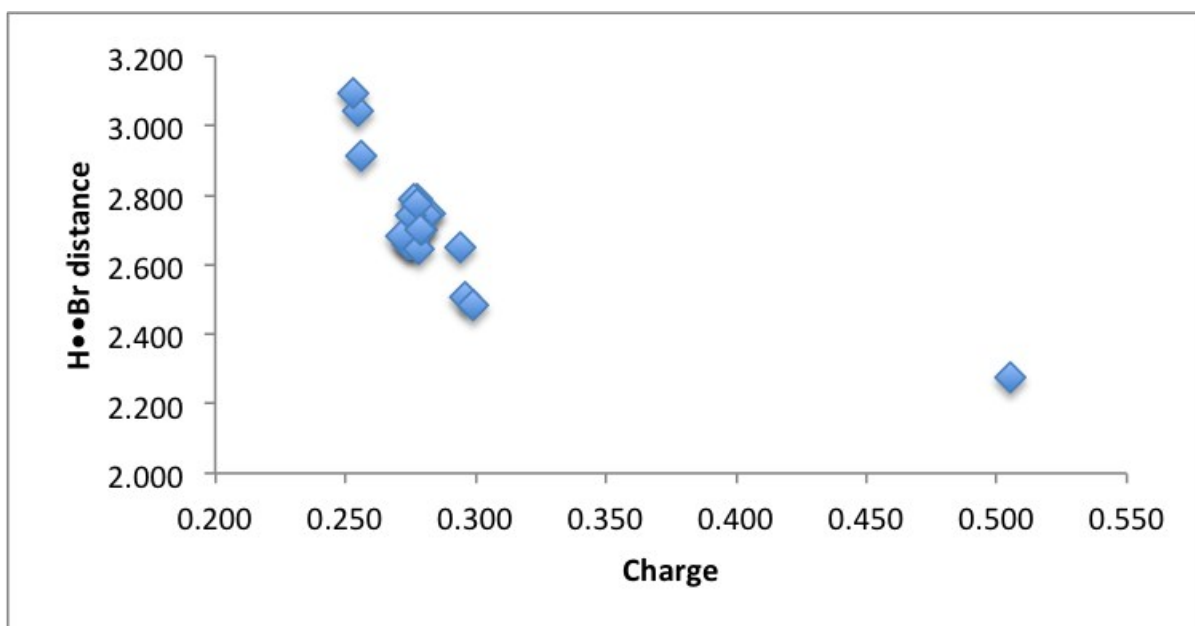

**Figure S4.** Relationship between H...Br distance in [Q][Br] ion pair and charge on the relevant hydrogen atom in isolated [Q]<sup>+</sup> calculated from energy-minimized structures (see Computational Details for further information) for the studied [Q][Br] ion pairs.

**Table S3.** Computed Raman absorptions for tri- and pentabromide species (cm<sup>-1</sup>)

|                                 | Calculated | After Standard Scale Factor | Experimental |
|---------------------------------|------------|-----------------------------|--------------|
| [Br <sub>3</sub> ] <sup>-</sup> | 181, 201   | 170, 188                    | 163, 190     |
| [Br <sub>5</sub> ] <sup>-</sup> | 223, 260   | 209, 244                    | 210, 253     |

### Supporting Raman Spectra

Raman spectra for each bromide salt solution are provided below in Figures S4*a-f*, revealing the polybromide fingerprint region (inset) and other Raman absorption signals up to 3500 cm<sup>-1</sup>. No observable influence of bromine addition on the Raman active absorption bands belonging to the solvent system (methanol nor acetonitrile) or the IL cation can be seen in these spectra.

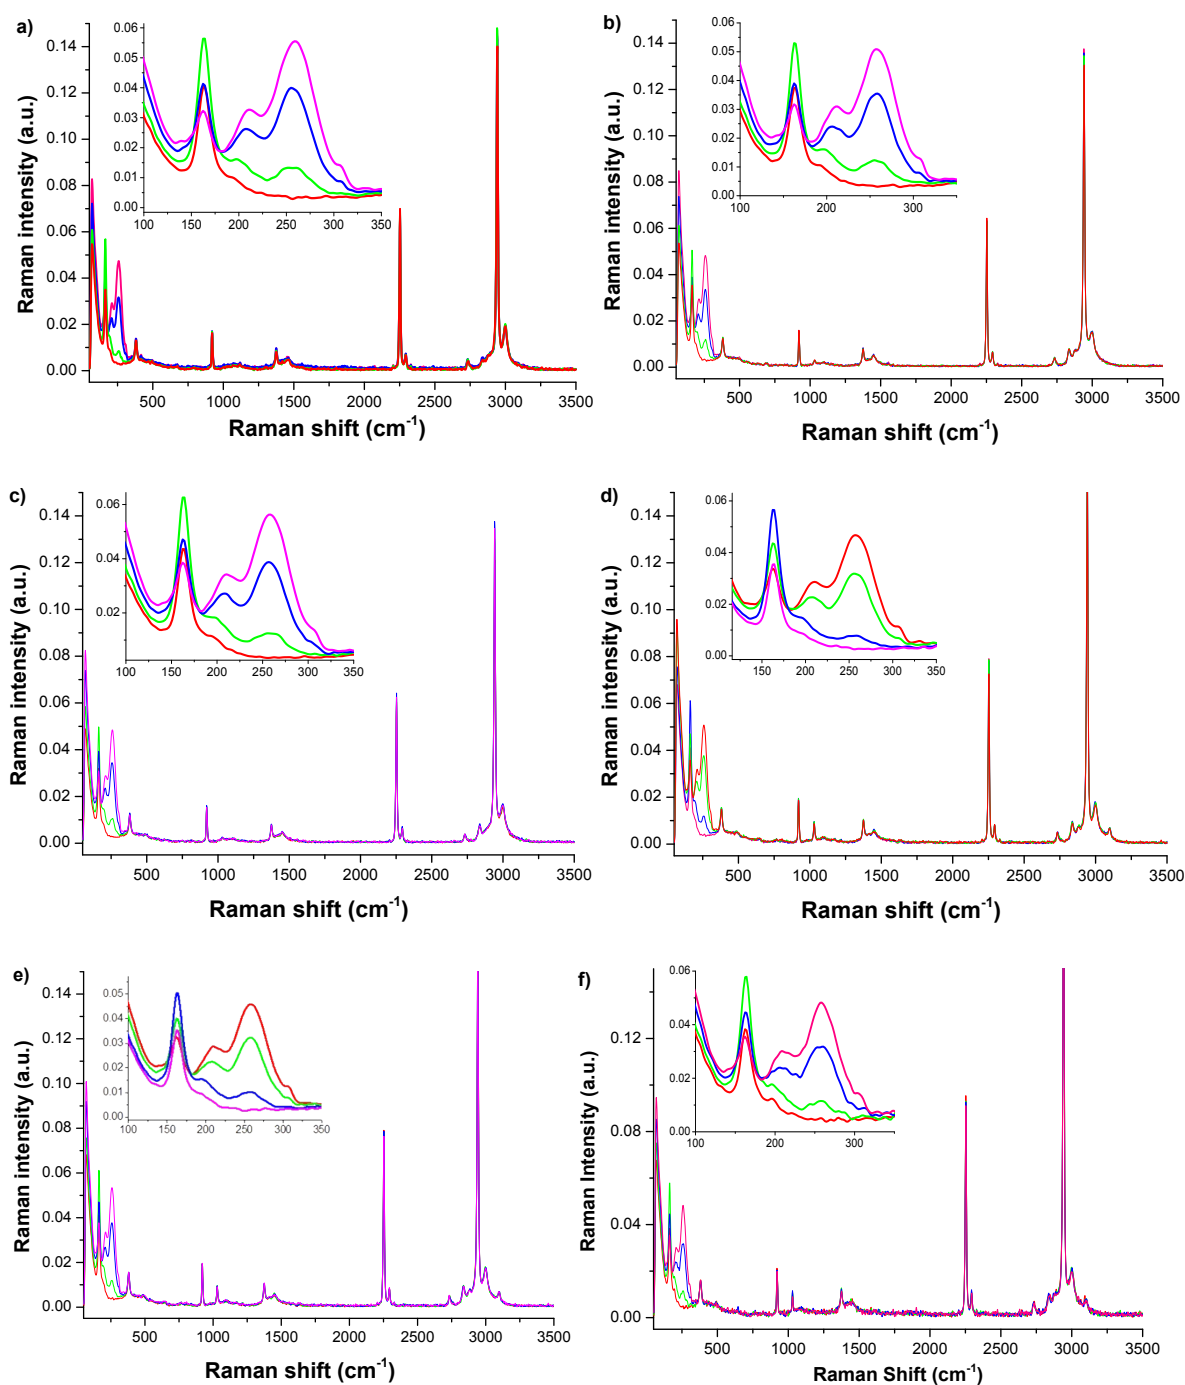

**Figure S4)** Complete Raman spectra for: a) [N<sub>2,2,2,2</sub>]Br<sub>5</sub>, **1Br<sub>5</sub>**; b) [C<sub>2</sub>MPip]Br<sub>5</sub>; c) **2Br<sub>5</sub>**; [C<sub>2</sub>MPyrr]Br<sub>5</sub>, **3Br<sub>5</sub>**; d) [C<sub>2</sub>Mim]Br<sub>5</sub>, **4Br<sub>5</sub>**; e) [C<sub>2</sub>Py]Br<sub>5</sub>, **5Br<sub>5</sub>**; f) [C<sub>2</sub>OHPy]Br<sub>5</sub>, **6Br<sub>5</sub>** showing the Raman absorption regions outside of the fingerprint region for polybromide compounds.

## Procedure for Dimerization Modelling

The NMR dimerization modelling method is nearly identical to that of Weber, et al.<sup>[1]</sup> Thus, the following is reproduced from the Supporting Information of that work for ease of reference:

Titration curves were fit to the dimerization model in equation (S1).

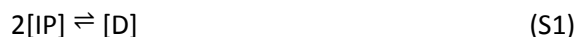

where [IP] is the concentration of ion pairs and [D] is the concentration of dimers.  $K_a$ , the association equilibrium constant for the dimerization, would be given by equation (S2):

$$K_a = \frac{[D]}{[IP]^2} \quad (S2)$$

The total concentration of ions is given by:

$$[C] = [IP] + 2[D] \quad (S3)$$

Rearranging equation (S2) and substituting into (S3) yields:

$$[C] = [IP] + 2[IP]^2 K_a$$

This can be further simplified through the following steps:

$$\begin{aligned} \frac{[C]}{2K_a} &= \frac{[IP]}{2K_a} + [IP]^2 \\ \frac{[C]}{2K_a} &= \left([IP] + \frac{1}{4K_a}\right)^2 - \frac{1}{16K_a^2} \\ [IP] + \frac{1}{4K_a} &= \frac{\sqrt{1 + 8K_a[C]}}{4K_a} \end{aligned}$$

Hence

$$[IP] = \frac{-1 + \sqrt{1 + 8K_a[C]}}{4K_a} \quad (S4)$$

Directly from equation (S3) it can be obtained that:

$$[D] = \frac{[C] - [IP]}{2} \quad (S5)$$

Finally the observed chemical shift can be treated as a weighted average of the dimeric and monomeric chemical shift environments:

$$\delta_{obs} = \frac{[IP]}{[C]}\delta_{ip} + \frac{2[D]}{[C]}\delta_d \quad (S6)$$

The titration curves obtained from the NMR spectra were correspondingly fit using the Origin 8.5 non-linear least squares fitting program to equation (S6) using equations (S4) and (S5) as constraints.

This was repeated for at least 9 different  $^1\text{H}$  NMR environments and the average of these values, weighted by  $|\delta_a - \delta_{ip}|$  for each environment, was reported.

The fits and titration curves are all shown in Figure S5. All  $R^2$  values exceed 0.99.

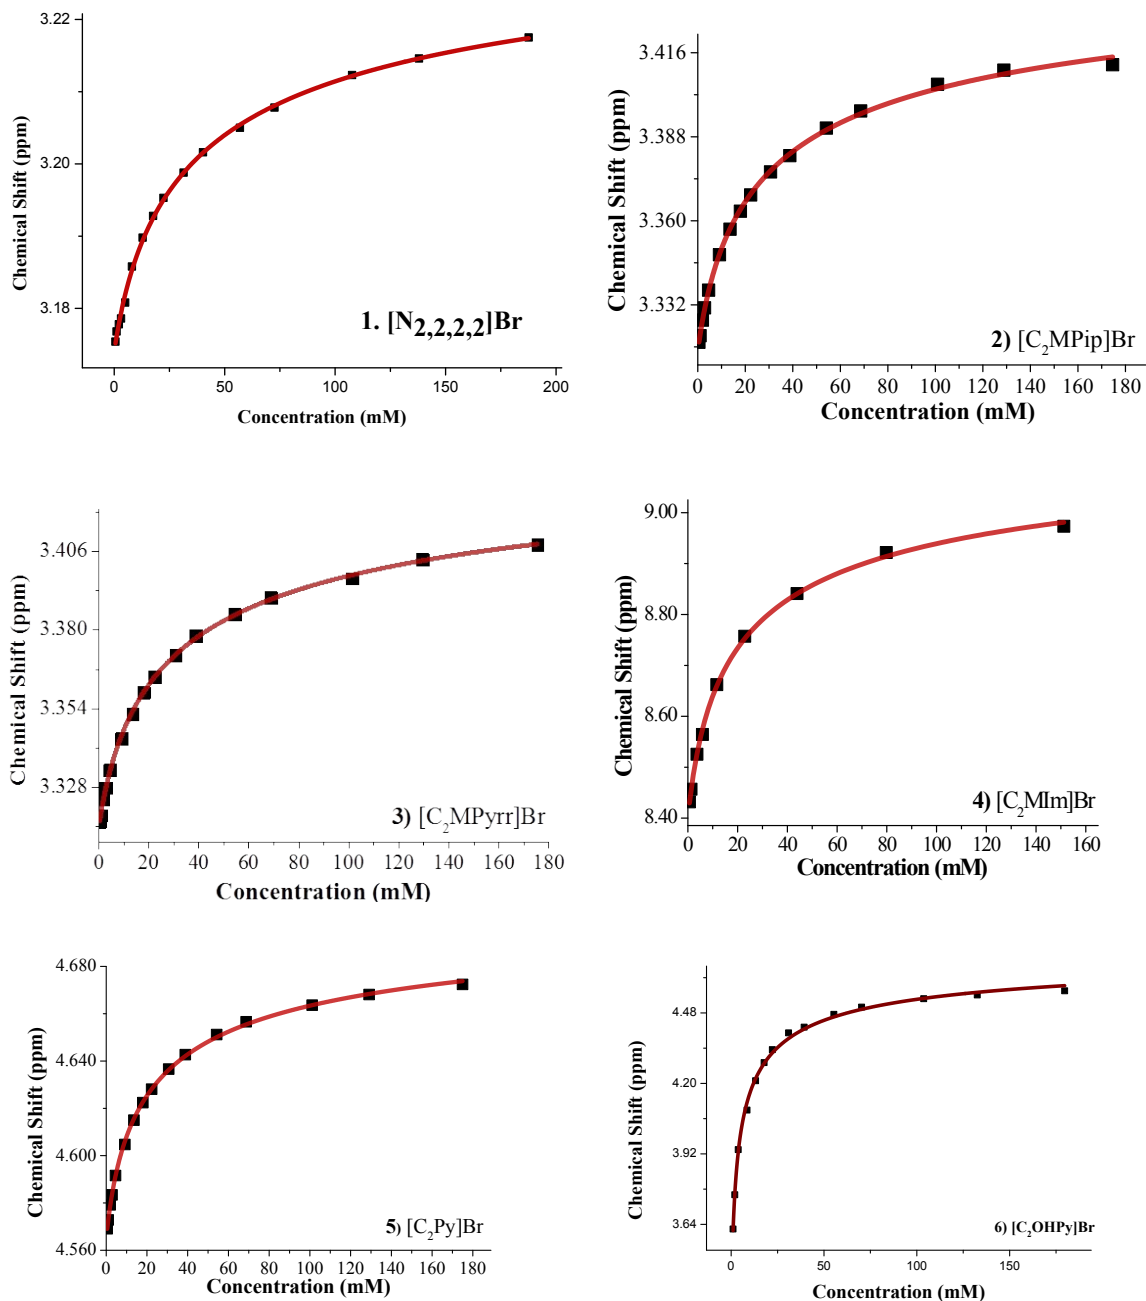

**Figure S5.** Fits of dimerization data obtained in the  $^1\text{H}$  NMR dilution titration, where chemical shift refers to that of the cation's C2 proton.

## References

- [1] C. C. Weber, A. F. Masters, T. Maschmeyer, *Journal of Physical Chemistry B* **2012**, *116*, 1858-1864.
